# Supplementary material for: Ultra-localized single cell electroporation using silicon nanowires
Source: Royal Society of Chemistry journal article supplement (doi:10.1039/c2lc40837f), 2012-11-26
Supplement: c2lc40837f.pdf [file c2lc40837f.pdf]

# Supplementary Table 1

| Parameter                                              | Symbol       | Value               | Ref |
|--------------------------------------------------------|--------------|---------------------|-----|
| Electric Field                                         | E            | Simulations         | -   |
| Cell Radius                                            | R            | 6.6 $\mu\text{m}$   | 1   |
| Angular Frequency                                      | $\omega$     | $2*\pi*10$ MHz      | -   |
| Capacitance Membrane/Area                              | $C_m$        | $\epsilon_m/h$      | -   |
| Absolute Permittivity of the Membrane                  | $\epsilon_m$ | $7.97*10^{-11}$ F/m | 2   |
| Thickness of the Membrane                              | h            | 5 nm                | 1   |
| Resistivity of the Interior of the Cell                | $\rho_i$     | 4.5 $\Omega*m$      | 1   |
| Resistivity of the Electrolyte                         | $\rho_a$     | 0.769 $\Omega*m$    | 3   |
| Polar Angle with Respect to the Direction of the Field | $\theta$     | 0                   | -   |

# Supplementary Figure S1

(a)

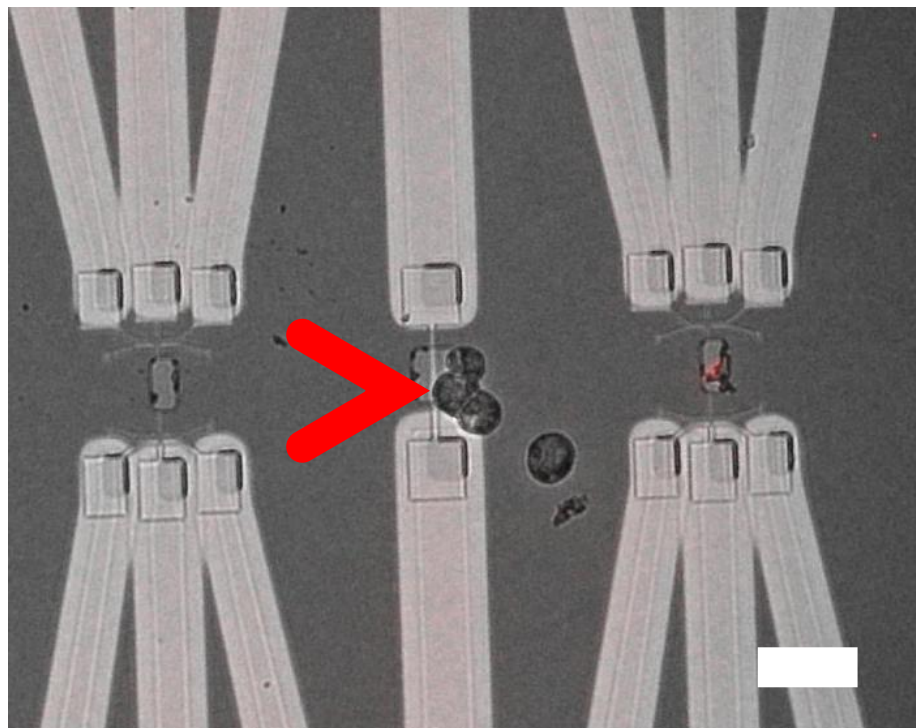

(b)

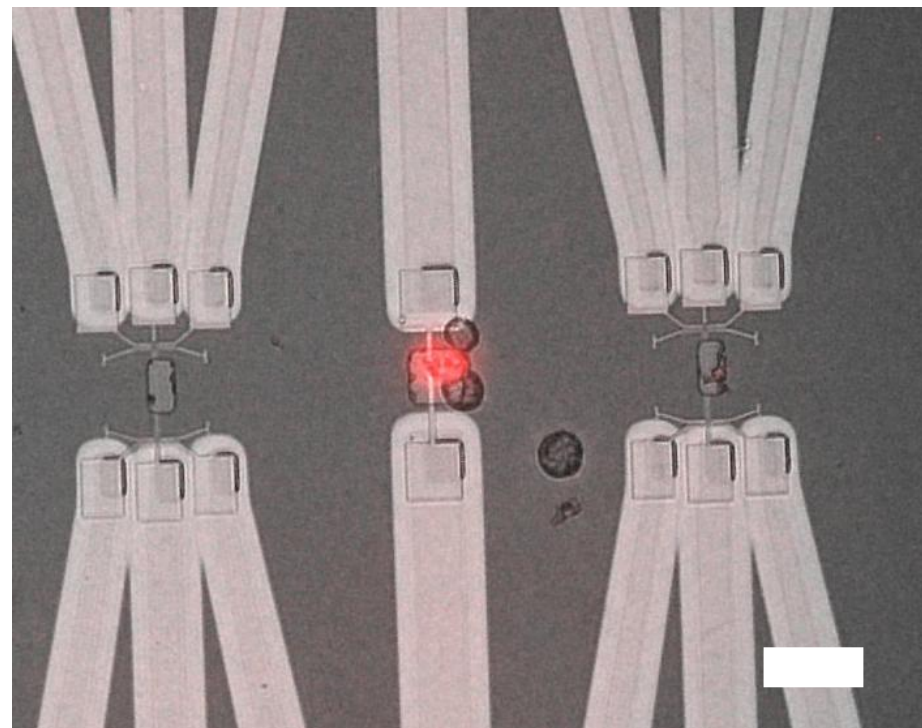

# Supplementary Figure S2

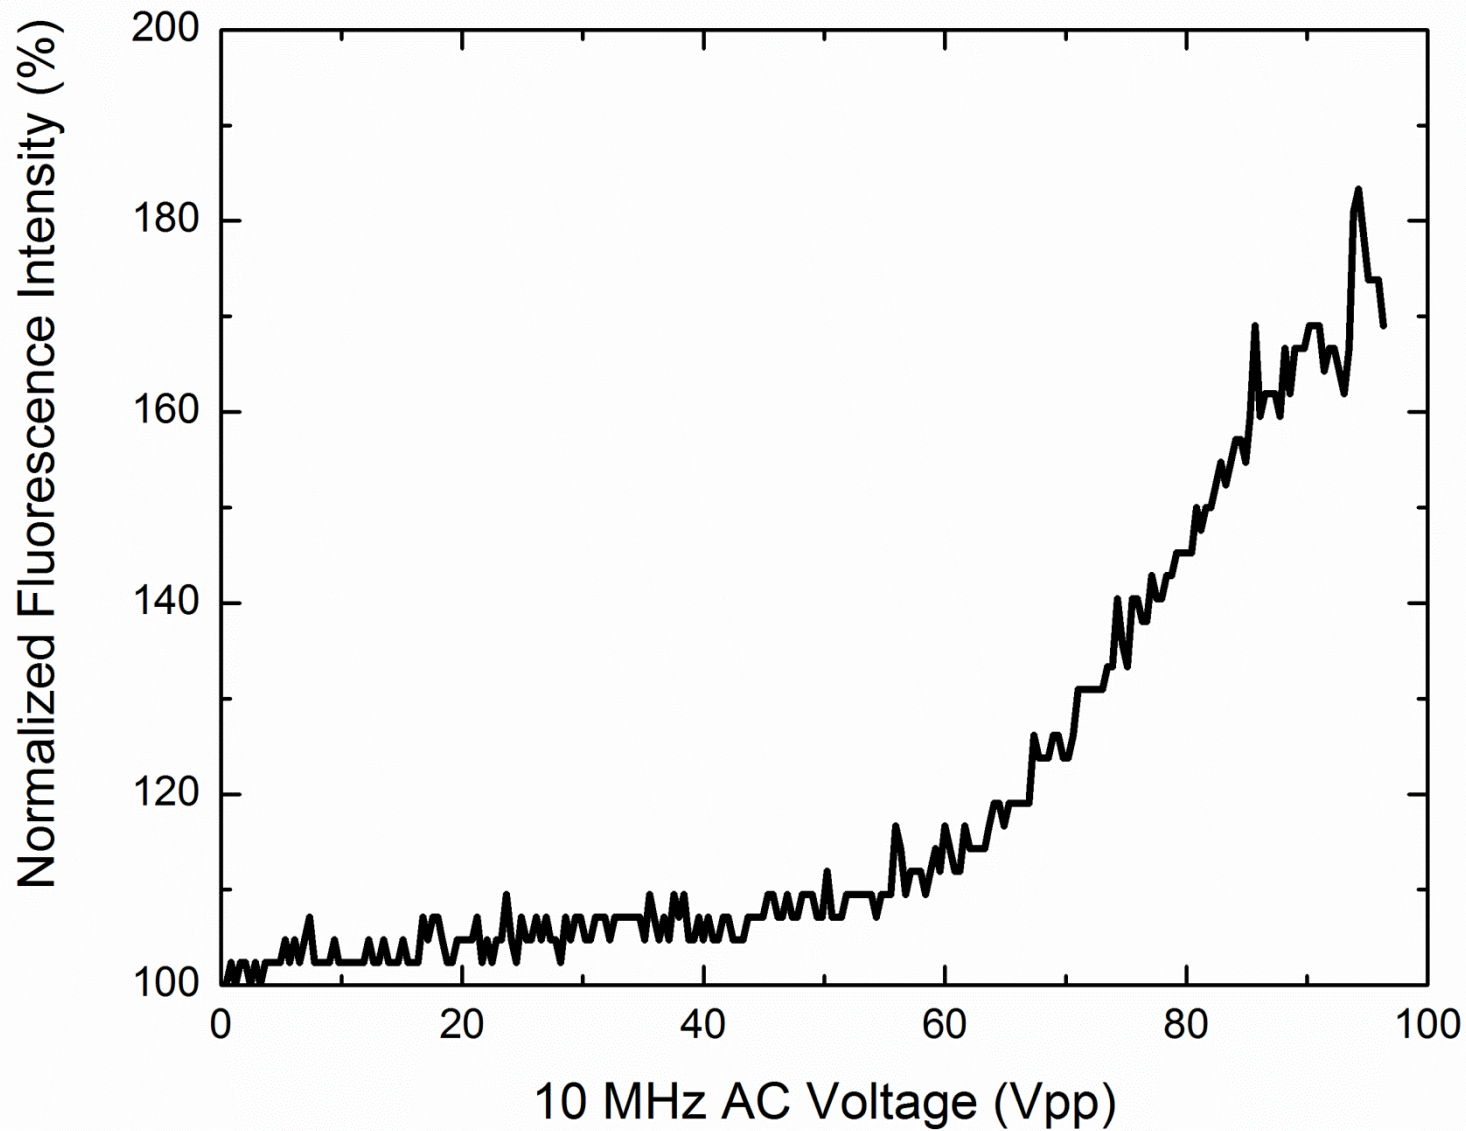



# Supplementary Figure S3

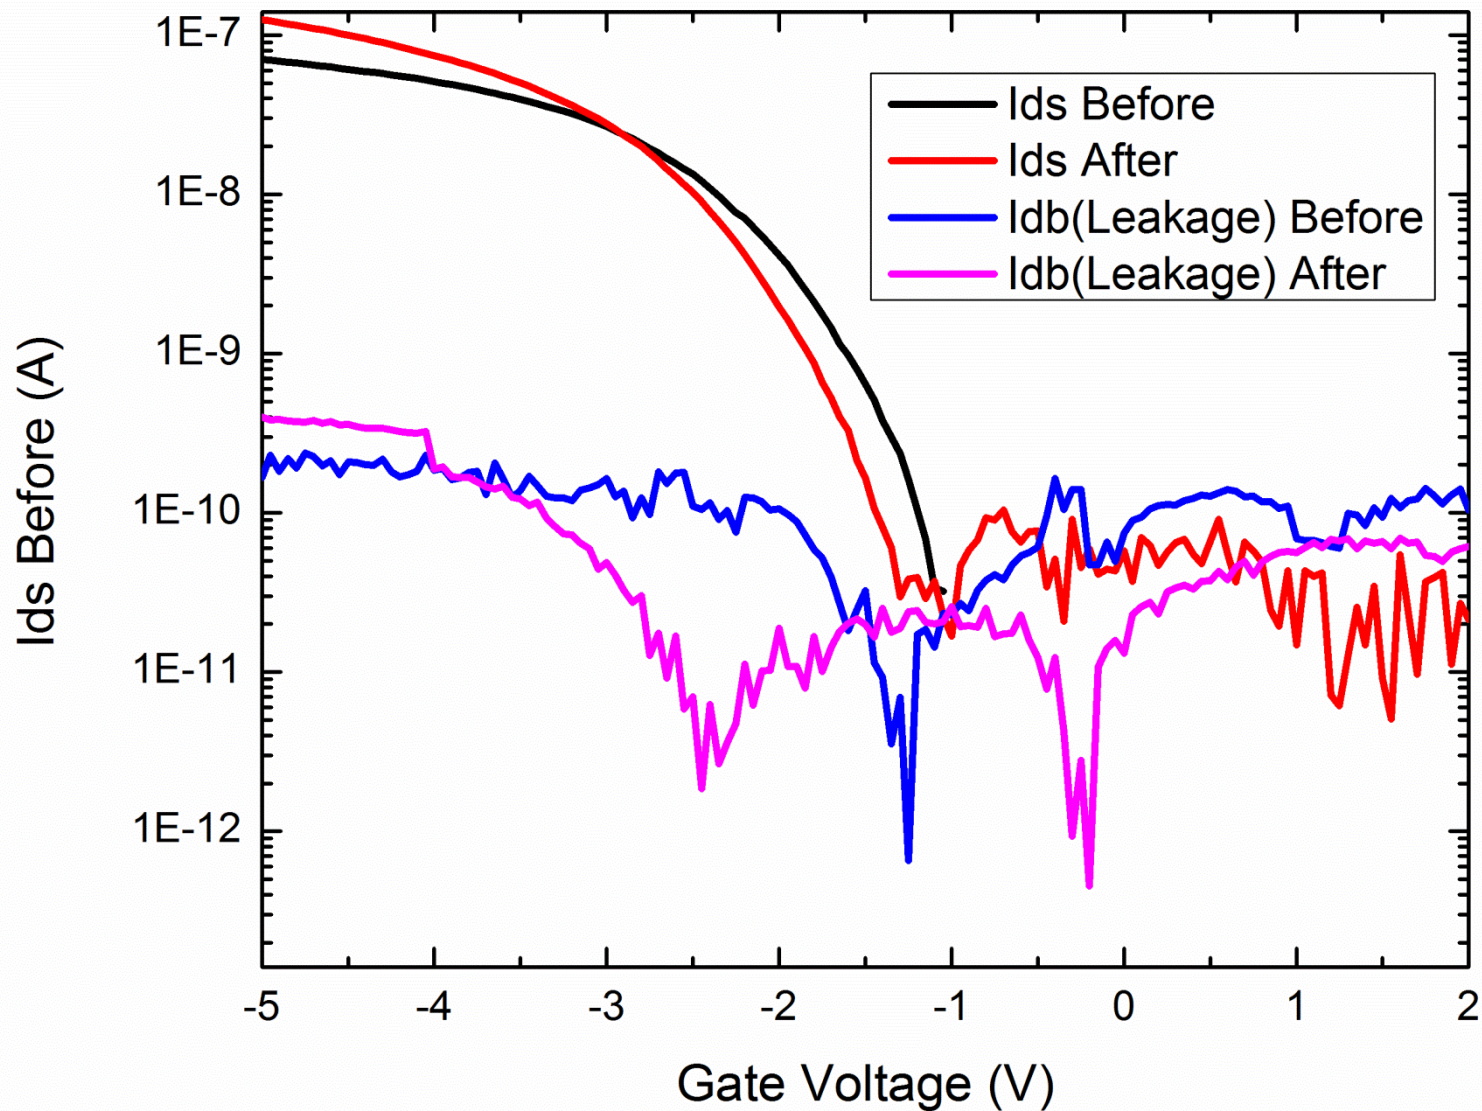

## Supplementary Figure Legends

Supplementary Fig. S1: Ultra-Localized Lysis. (A) and (B) are merged brightfield and PI fluorescence images. (A) Shows a grouping of 3 cells above the central nanoribbon device. Only one of these cells (red arrow) is directly above the nanoribbon. (B) After lysis, only the cell that was directly above the device shows a PI fluorescence increase. This implies the lysis of cells is very highly localized to within nanometers of the device surface. Scale bars for (A) and (B) are 40  $\mu\text{m}$

Supplementary Fig. S2: FRET Construct Melting. A plot of fluorescence increase observed from a 72 °C dsDNA FRET construct denaturing with applied voltage. At the voltages used for irreversible electroporation, 600-900mV<sub>pp</sub>, no fluorescence increase is observed. This implies that heating is not the likely cause of cell lysis.

Supplementary Fig. S3: Current-Voltage Transistor Characterization Before and After Signal Application. The leakage current from the drain to the bulk ( $I_{db}$ ) remains below  $10^{-9}$  A before and after cell lysis. The drain-source current ( $I_{ds}$ ) retains typically transistor characteristics before and after signal application.

Supplementary Video SV1: A video of an HT-29 cell being positioned above a group of nanowires using the magnetic trapping system.

Supplementary Table 1: Constants for Transmembrane Potential Calculations

## Supplementary Information References

1. L. Wu, L. Lanry Yung and K. Lim, *Biomicrofluidics*, 2012, **6**.
2. D. Malleo, J. T. Nevill, L. P. Lee and H. Morgan, *Microfluidics and Nanofluidics*, 2010, **9**, 191-198.
3. A. P. Mazzoleni, B. F. Siskin and R. L. Kahler, *Bioelectromagnetics*, 1986, **7**, 95-99.
